# Supplementary material
Source: PubMed Central journal article supplement (PMC4095795)
Supplement: NIHMS597380-supplement-Supporting_Information.pdf [file NIHMS597380-supplement-Supporting_Information.pdf]

# **Inhibition of Cathepsin Activity in a Cell-Based Assay by a Light-Activated Ruthenium Compound**

Tomasz Respondek,<sup>1</sup> Rajgopal Sharma,<sup>1</sup> Mackenzie K. Herroon,<sup>2</sup> Robert N. Garner,<sup>3</sup> Jessica D. Knoll,<sup>3</sup> Eric Cueny,<sup>1</sup> Claudia Turro,<sup>3</sup> Izabela Podgorski<sup>2,4</sup>  
and Jeremy J. Kodanko<sup>1,4\*</sup>

<sup>1</sup>Department of Chemistry, Wayne State University, 5101 Cass Ave, Detroit, MI 48202

<sup>2</sup>Department of Pharmacology, School of Medicine, Wayne State University, Detroit, Michigan 48201

<sup>3</sup> Department of Chemistry and Biochemistry, The Ohio State University, Columbus, Ohio 43210

<sup>4</sup> Barbara Ann Karmanos Cancer Institute, Detroit, Michigan 48201

**Supporting Information**

**(7 Pages)**

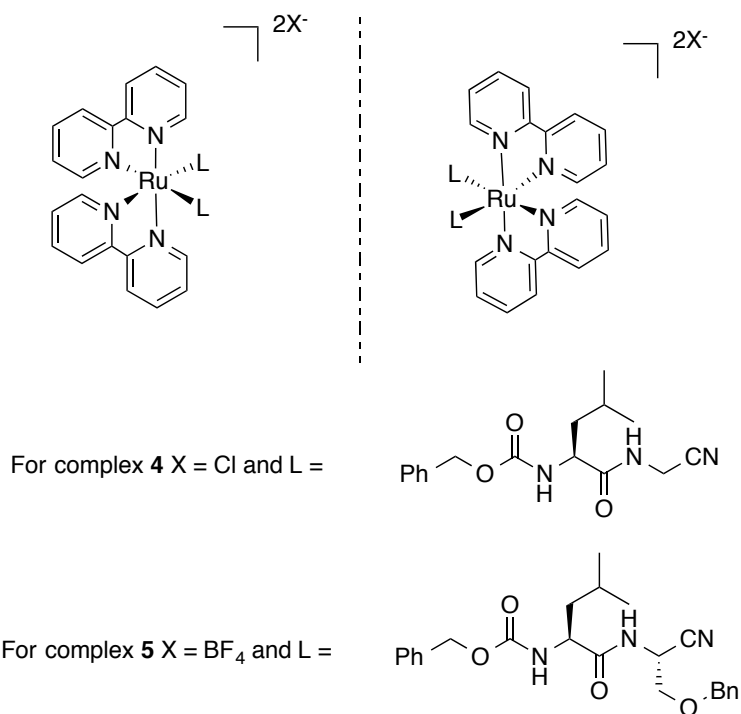

**Figure S1.**  $\Delta$ -cis [Ru(bpy)<sub>2</sub>(L)<sub>2</sub>]X<sub>2</sub> and  $\Lambda$ -cis [Ru(bpy)<sub>2</sub>(L)<sub>2</sub>]X<sub>2</sub>

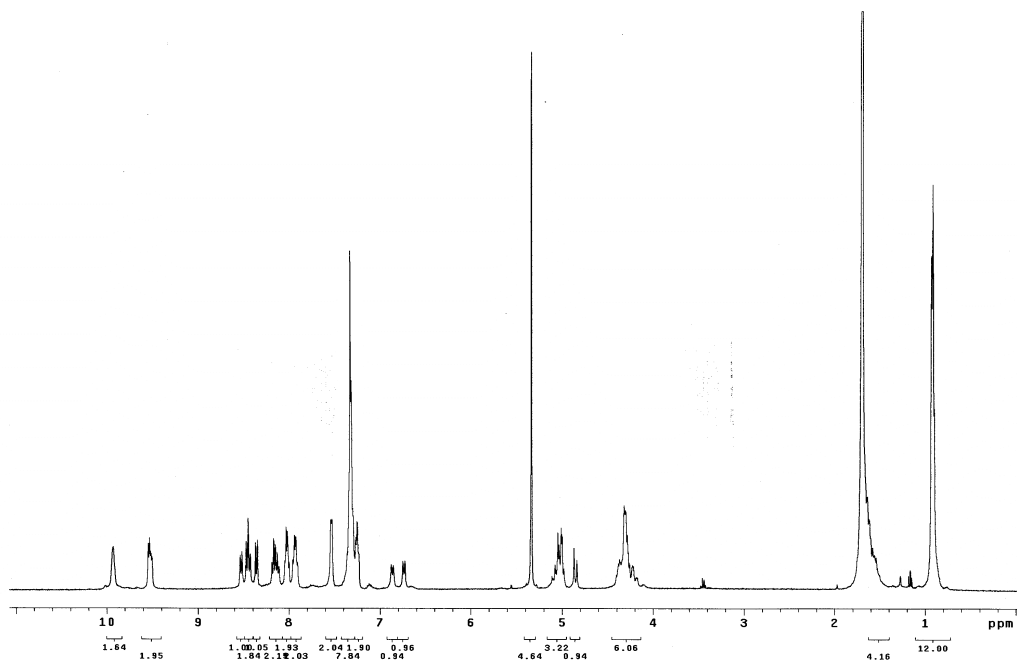

**Figure S2.** <sup>1</sup>H NMR spectrum for (4)

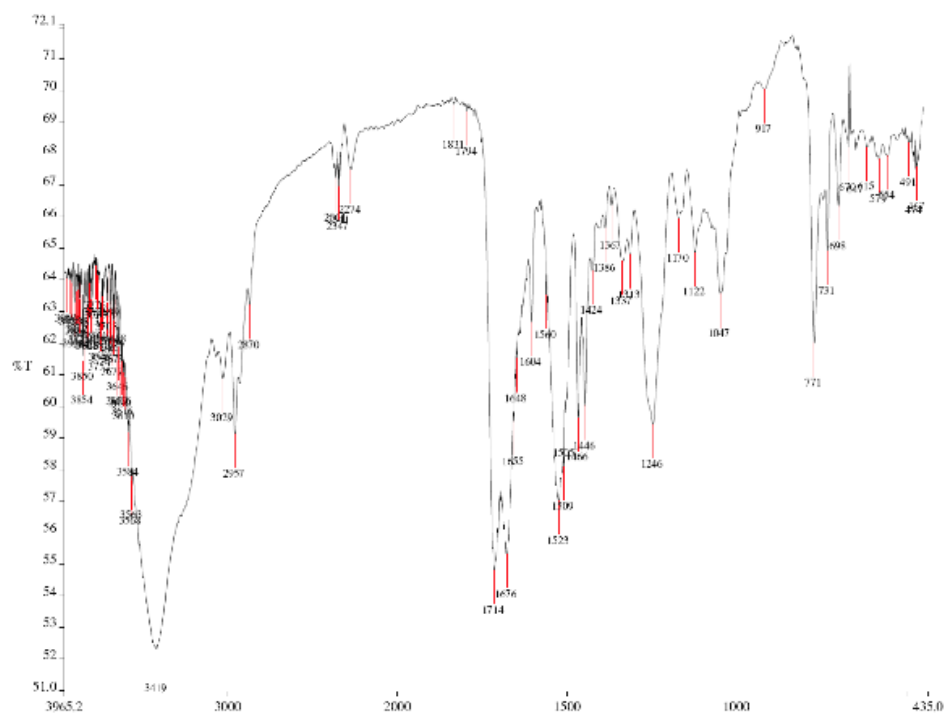

Figure S3. IR spectrum for (4)

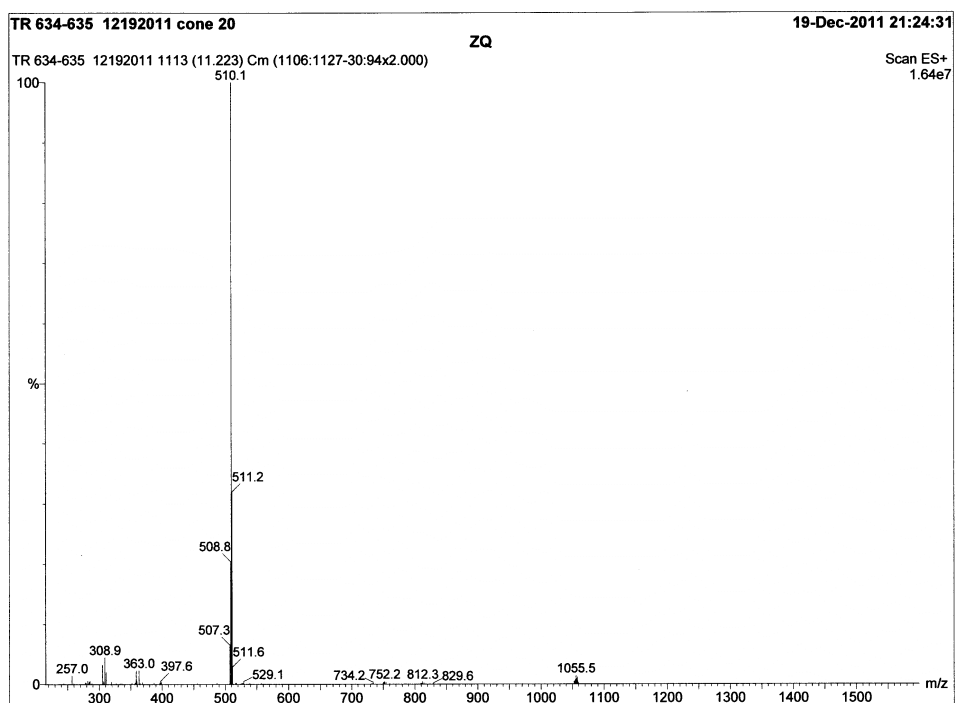

Figure S4. LRMS (ESMS) of (4)

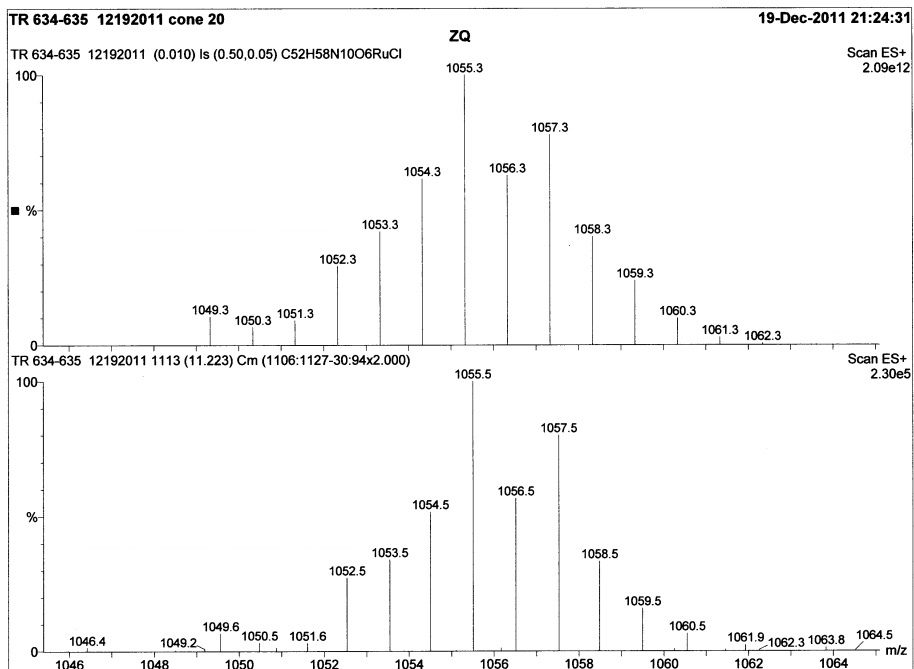

Figure S5. LRMS (ESMS) of (4): Isotope pattern

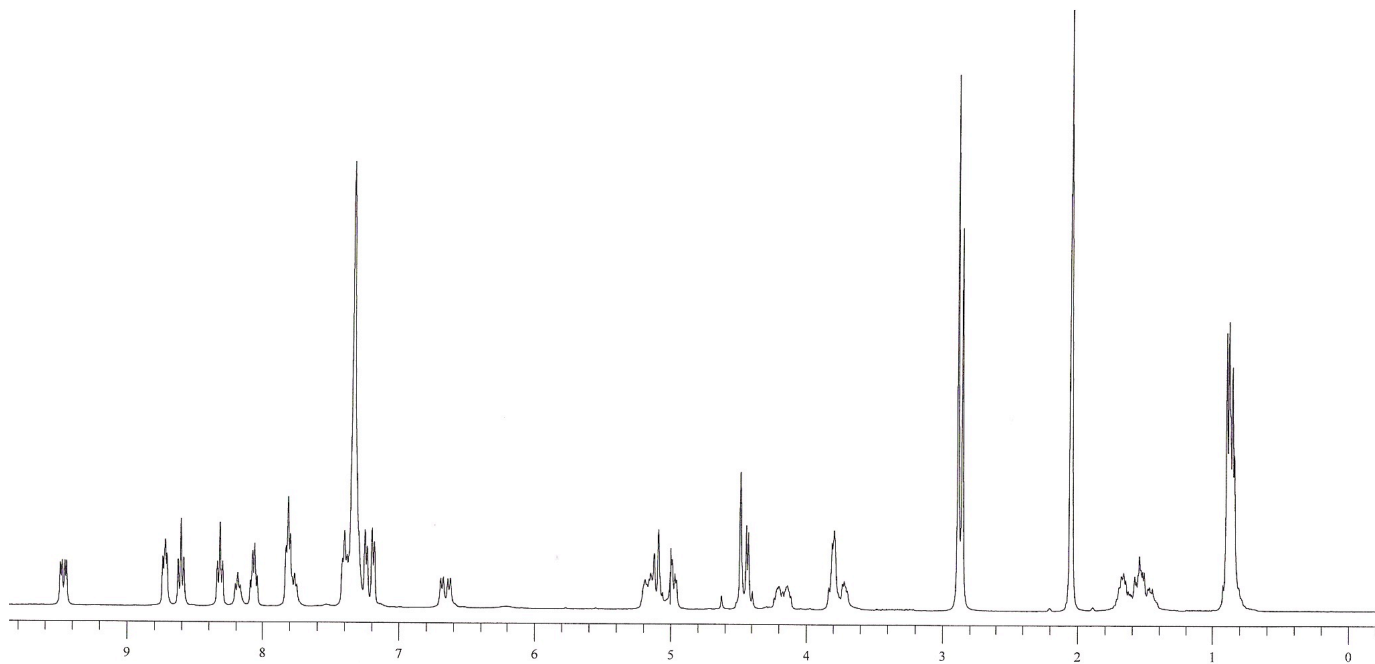

Figure S6.  $^1\text{H}$  NMR spectrum for (5)

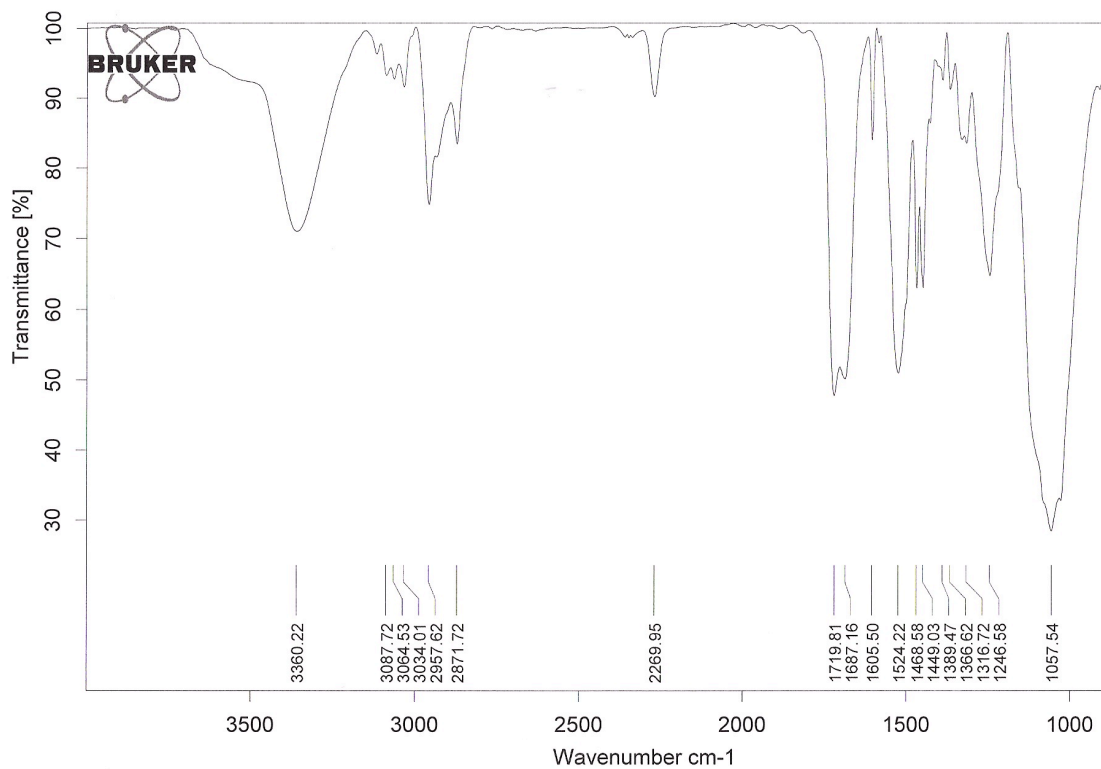

Figure S7. IR spectrum for (5)

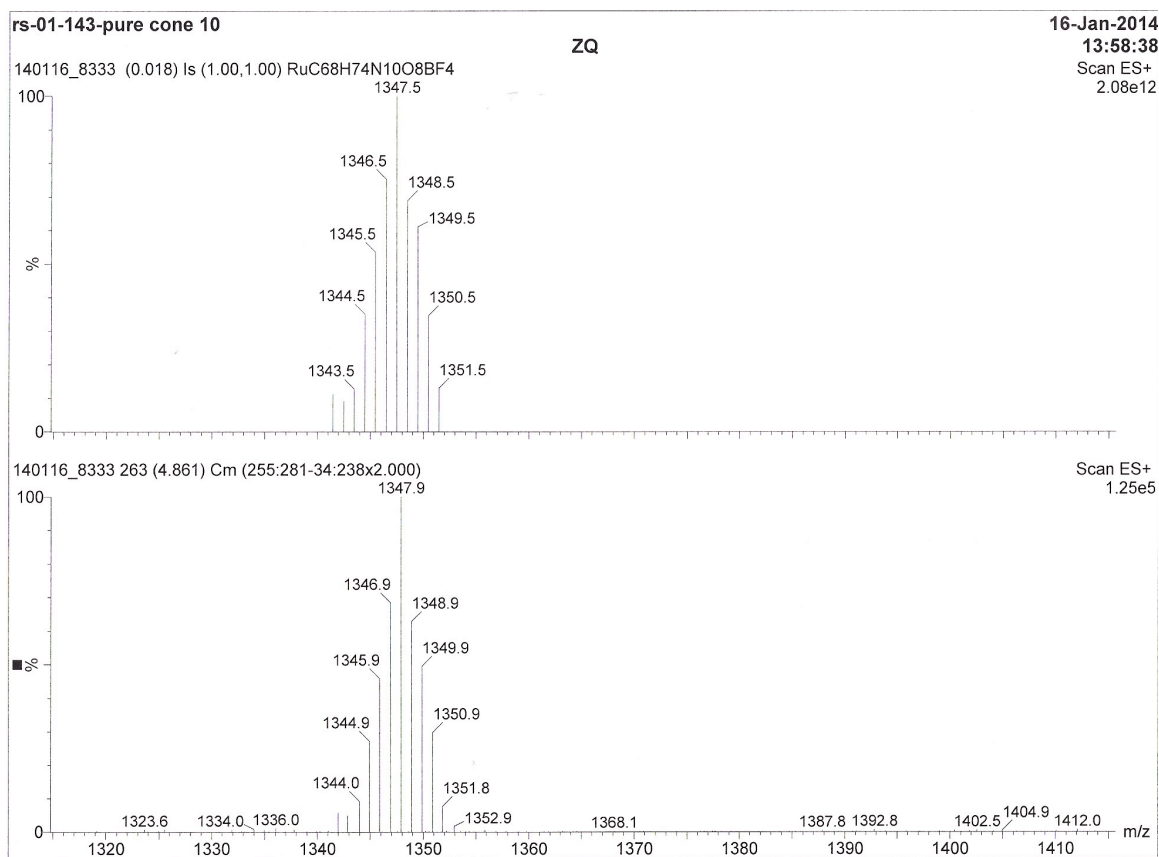

Figure S8. LRMS (ESMS) of (5): Isotope pattern

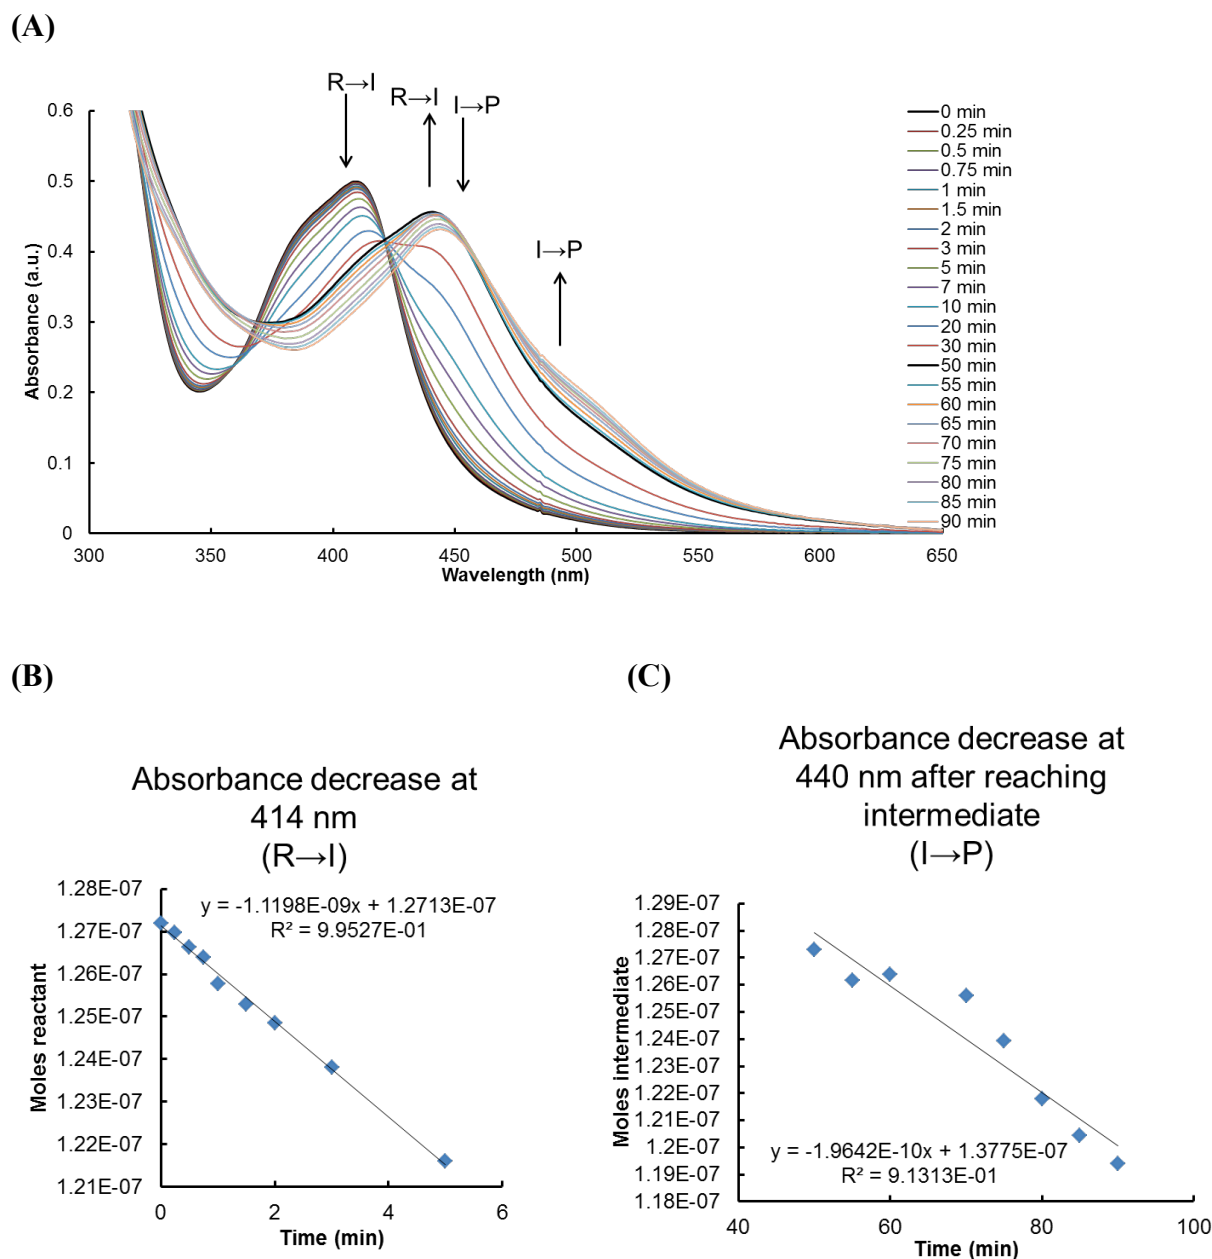

**Figure S9.** (A) Electronic absorption spectra of **5** in H<sub>2</sub>O (2 % acetone) irradiated with a 150 W Xe arc lamp using a 345 nm long-pass filter and a 400 nm bandpass filter ( $5.34 \times 10^{-8}$  mol photons/min). R = reactant (*cis*-[Ru(bpy)<sub>2</sub>(3)]<sup>2+</sup>), I = intermediate ([Ru(bpy)<sub>2</sub>(3)(OH<sub>2</sub>)]<sup>2+</sup>), P = product (*cis*-[Ru(bpy)<sub>2</sub>(OH<sub>2</sub>)<sub>2</sub>]<sup>2+</sup>). The absorbance at early times was used to determine the moles of reactant (B) or intermediate (C) consumed, and the slopes of the lines represent the rate of consumption (mol/min). (B) and (C) represent one of three trials.

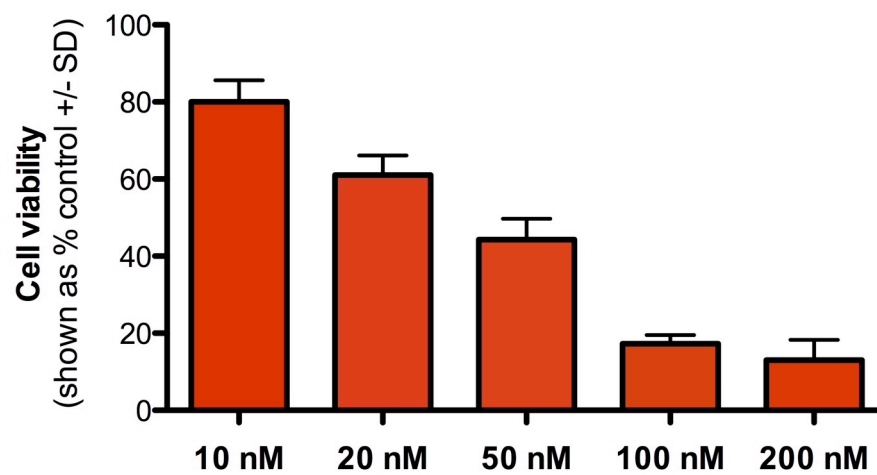

**Figure S10.** Positive control for cell viability experiments in Figure 4 of the manuscript. PC3 cells were exposed to increasing concentrations (10 nM – 200 nM) of the known cytotoxic agent Docetaxel. See Figure 4 for additional experimental details.
